# Supplementary material for: A highly sensitive and selective fluorescent probe for quantitative detection of Al3+ in food, water, and living cells
Source: Royal Society of Chemistry journal article supplement (doi:10.1039/c9ra00447e), 2019-01-01
Supplement: c9ra00447e1.pdf [file c9ra00447e1.pdf]

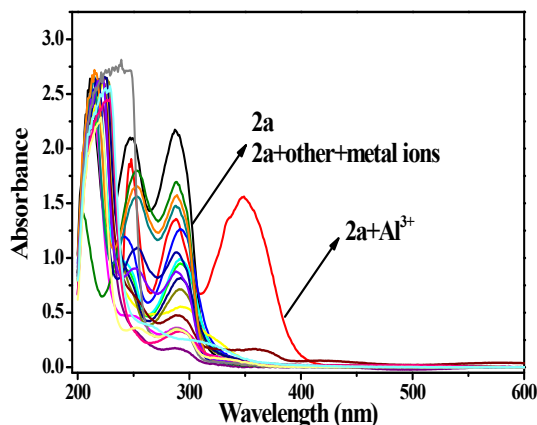

**Fig. S1.** Absorbance spectra of probe **2a** ( $5.0 \times 10^{-6}$  M) in the presence of 10 equiv of different metal ions in  $C_2H_5OH$  solution.

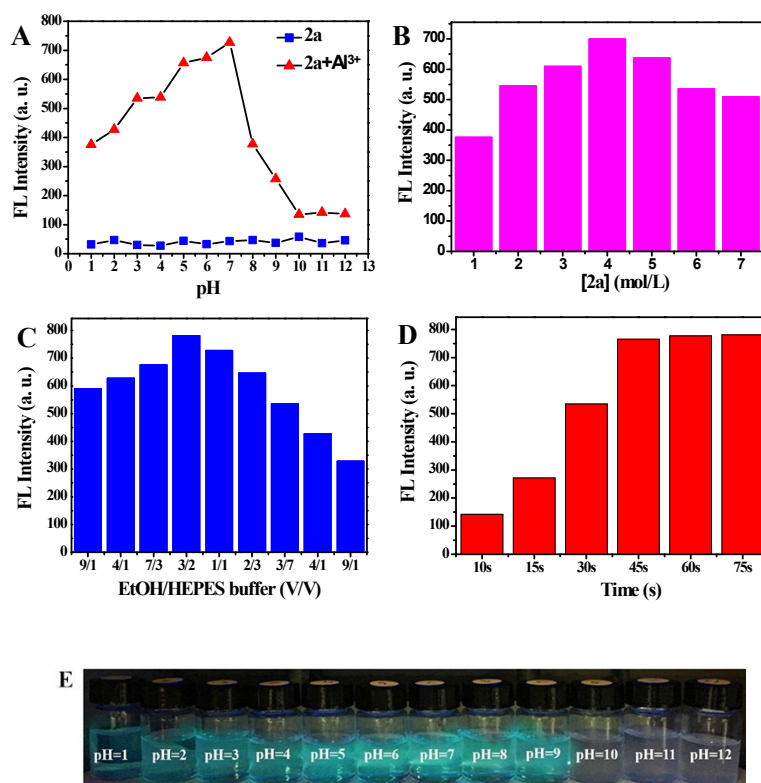

**Fig. S2** The fluorescence intensity of probe **2a** ( $5.0 \times 10^{-6}$  M) in the absence or presence of  $Al^{3+}$  in EtOH solution at different pH values (1–12) ( $\lambda_{ex} = 330$  nm) (A). The fluorescence intensity of different concentration of probe **2a** in the presence of  $Al^{3+}$  ( $5.0 \times 10^{-5}$  M) (B). The fluorescence intensity of probe **2a** ( $5.0 \times 10^{-6}$  M) with  $Al^{3+}$  in the presence of  $Al^{3+}$  at different EtOH/HEPES buffer (C), in EtOH solution at different response time (D). Fluorescence photograph of **2a** ( $5.0 \times 10^{-6}$  M) in the absence or presence of  $Al^{3+}$  under a UV lamp at 365 nm (E).

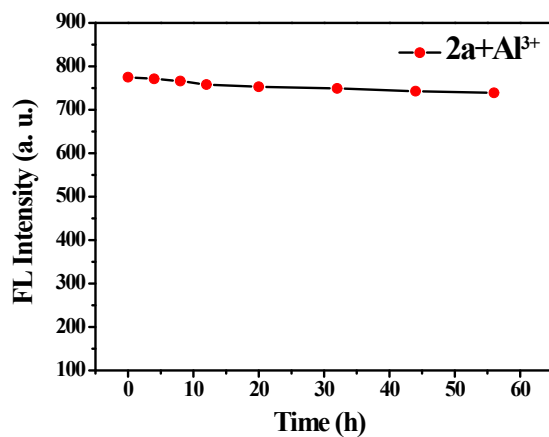

**Fig. S3.** The fluorescence intensity of probe **2a** ( $5.0 \times 10^{-6}$  M) with  $\text{Al}^{3+}$  in solution (EtOH/HEPES buffer, v/v = 6/4, 10 mM HEPES, pH = 7.4) at different time,  $\lambda_{\text{ex}} = 330$  nm

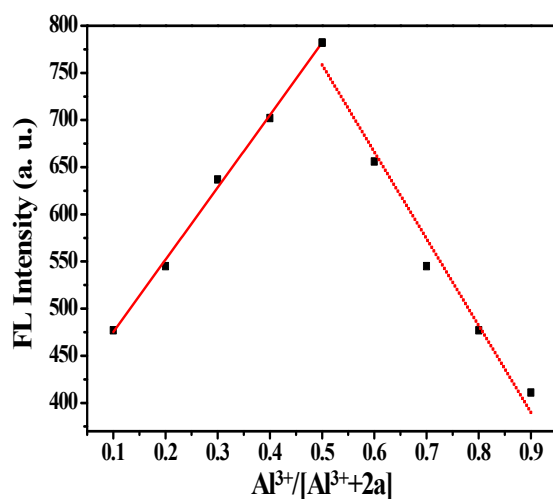

**Fig. S4.** Job's plots for determining the stoichiometry of **2a** and  $\text{Al}^{3+}$  in solution (EtOH/HEPES buffer, v/v = 6/4, 10 mM HEPES, pH = 7.4),  $\lambda_{\text{ex}} = 330$  nm.

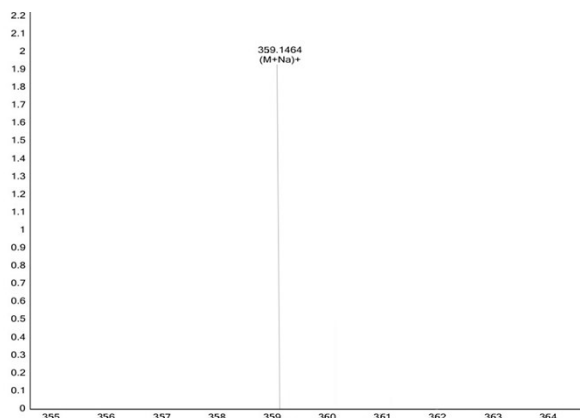

**Fig. S5.** The HRMS spectra of **2a**- $\text{Al}^{3+}$  complex.

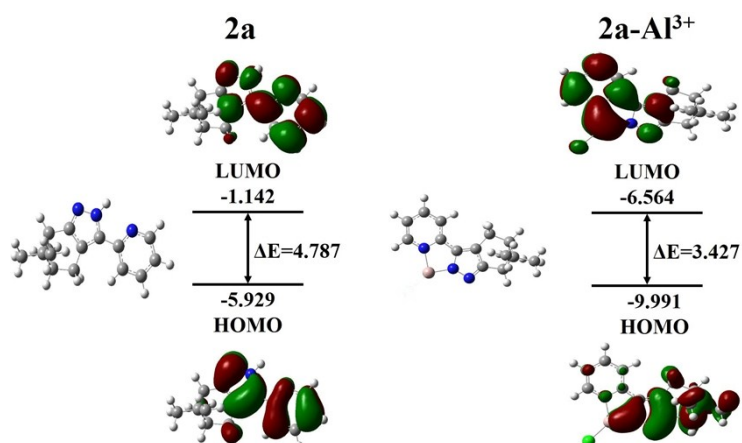

**Fig. S6.** Molecular orbitals (LUMO and HOMO) of compounds **2a** and **2a-Al<sup>3+</sup>** complex.

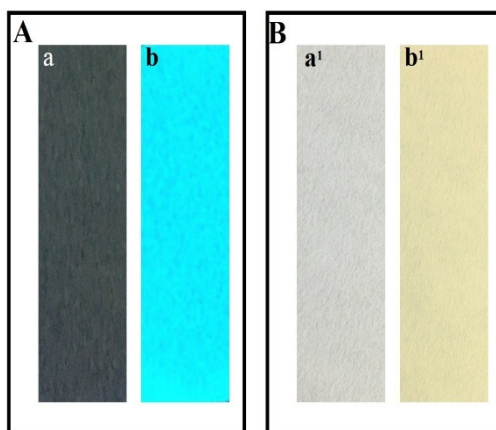

**Fig. S7.** Images of **2a**-based test strips tested with Al<sup>3+</sup> 365 nm under UV lamp (A, a: **2a**; b: **2a**+Al<sup>3+</sup>) and under sunlight (B, a1: **2a**; b1: **2a**+Al<sup>3+</sup>).

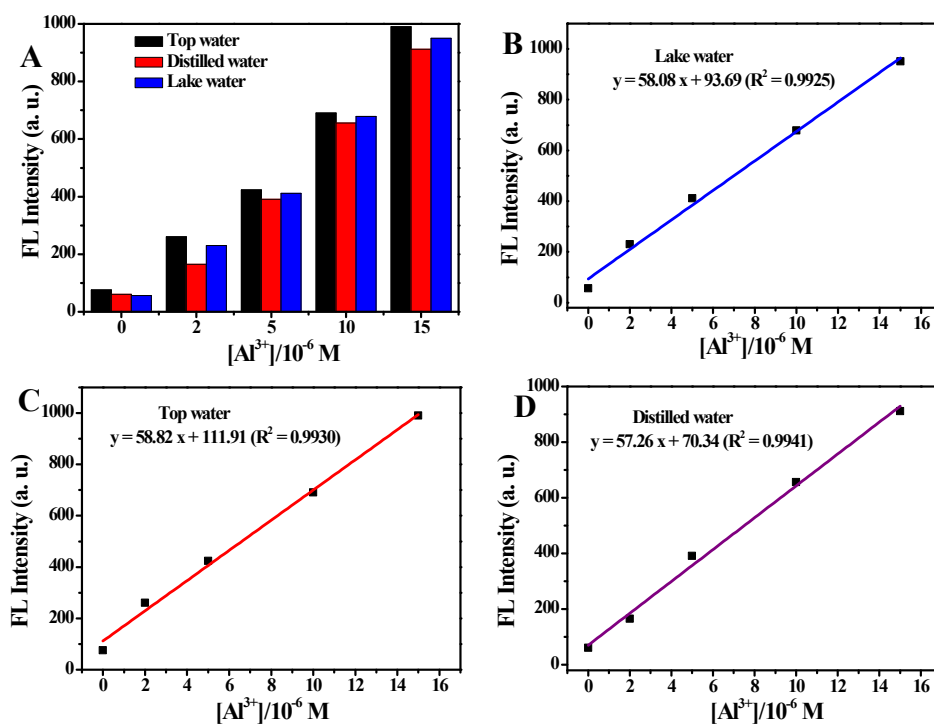

**Fig. S8.** Fluorescence intensity of probe **2a** treatment with Al<sup>3+</sup> (0, 2, 5, 10, 15 μM) in three water samples. The linear relationship between the fluorescence intensity and Al<sup>3+</sup> concentration (0, 2, 5, 10, 15 μM) in (b) lake water and (c) tap water and (d) distilled water samples.

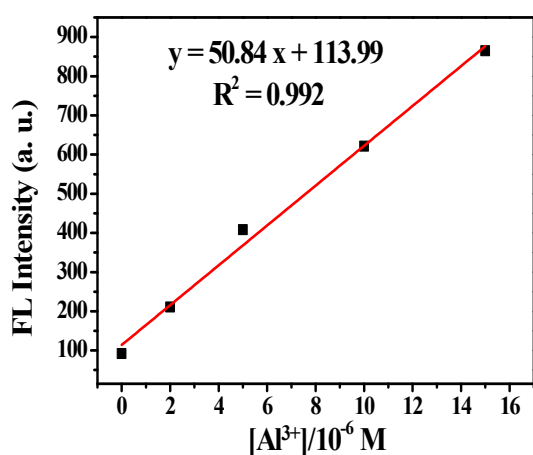

**Fig. S9.** The linear relationship between the fluorescence intensity and Al<sup>3+</sup> concentration (0, 2, 5, 10, 15 μM) in 20% HCl (V/V) aqueous solution.

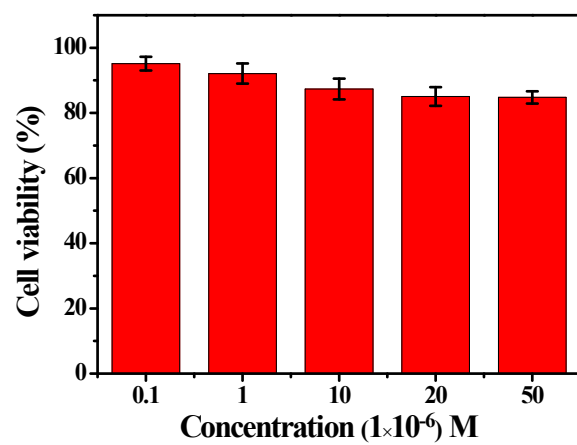

**Fig. S10.** MTT assay of HeLa cells was incubated with 0.1, 1, 10, 20 and 50 × 10<sup>-6</sup> M probe **2a** for 48 h.

**Table S1** Comparison of different fluorescent probes for the determination of Al<sup>3+</sup>.

| Probe                                                                               | In food samples test | Solution                                   | Detection limit       | Reference                           |
|-------------------------------------------------------------------------------------|----------------------|--------------------------------------------|-----------------------|-------------------------------------|
| 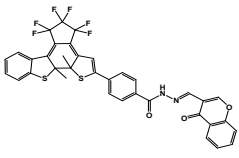   | NO                   | CH <sub>3</sub> CN                         | 5.47×10 <sup>-7</sup> | Dyes and Pigments, 2018, [37]       |
|    | NO                   | Methanol                                   | 9.3×10 <sup>-8</sup>  | Tetrahedron Letters, 2017, [38]     |
|    | NO                   | H <sub>2</sub> O:DMF=1 :5                  | 7.5×10 <sup>-7</sup>  | J. Photoch. Photobio. A, 2018, [39] |
|    | NO                   | H <sub>2</sub> O:CH <sub>3</sub> CN = 3:1  | 7.5×10 <sup>-7</sup>  | Sens. Actuators B: Chem, 2018, [40] |
|  | NO                   | CH <sub>3</sub> OH:H <sub>2</sub> O = 4:1, | 2.99×10 <sup>-7</sup> | Sens. Actuators B: Chem, 2017, [41] |
|  | NO                   | Methanol                                   | 8.08×10 <sup>-8</sup> | Spectrochim. Acta A, 2018, [42]     |
|  | NO                   | Methanol                                   | 1.75×10 <sup>-7</sup> | J. Photoch. Photobio. A, 2017, [43] |
|  | Yes                  | EtOH/HEPS buffer = 7/3                     | 8.1×10 <sup>-8</sup>  |                                     |
